# Supplementary material for: Promising transport properties of multifunctional monolayer GeSe nanodevices
Source: Royal Society of Chemistry journal article supplement (doi:10.1039/d4tc00845f), 2024-01-01
Supplement: d4tc00845f1.pdf [file d4tc00845f1.pdf]

## Supplementary Material

### Promising transport properties of multifunctional monolayer GeSe nanodevices

Xianghe Liu, Yuliang Mao<sup>†</sup>

Hunan Key Laboratory for Micro–Nano Energy Materials and Devices, School of Physics and  
Optoelectronics, Xiangtan University, Hunan 411105, China

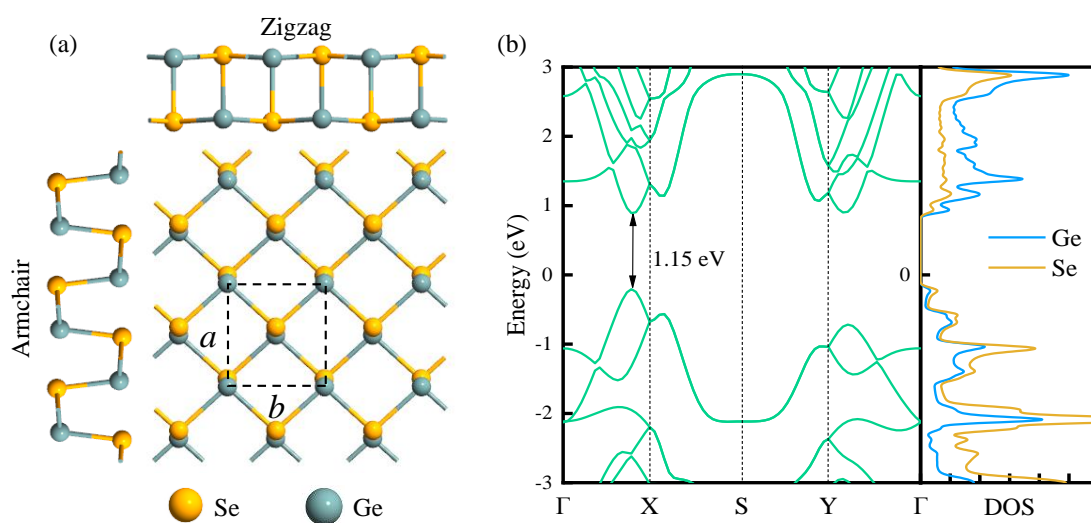

**FIG. S1.** (a) Top view and side views along the Z-type and A-type directions of ML GeSe, where the black dashed box represents the unit cell. (b) Band structure and DOS of ML GeSe.

<sup>†</sup>Corresponding author, E-mail address: ylmao@xtu.edu.cn

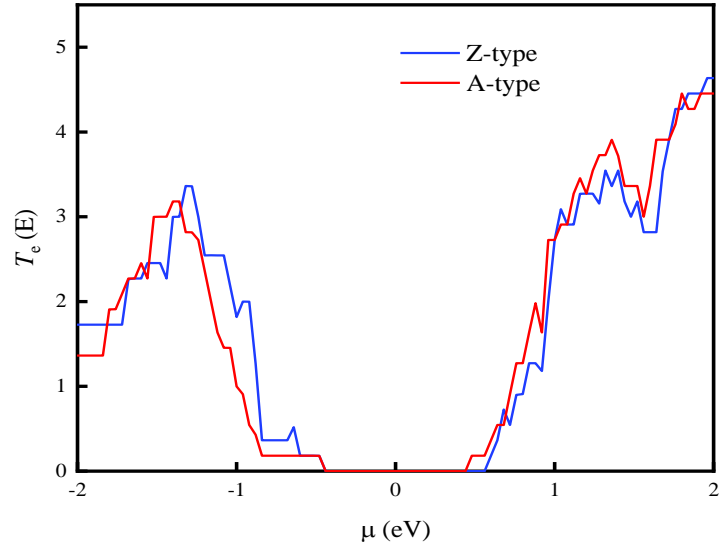

**FIG. S2.** Electron transmission functions of ML GeSe nanodevices along Z- and A-type directions.

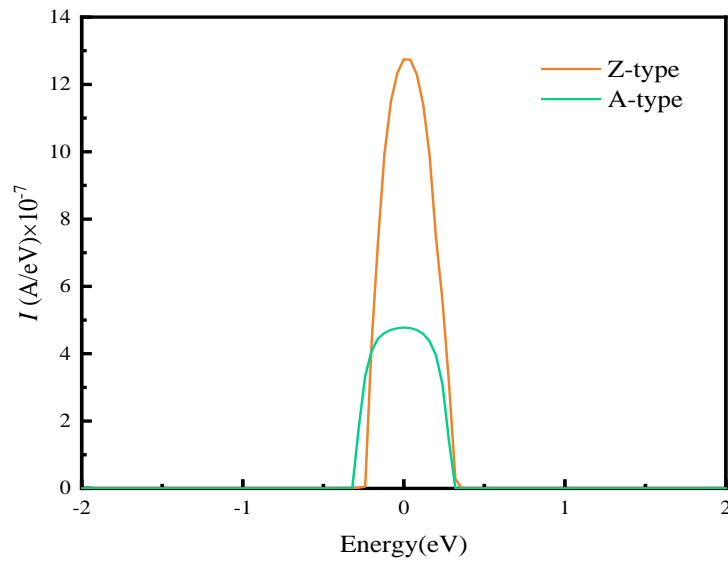

**FIG. S3.** Spectral current of Z/A-type ML GeSe *p-n* junction diode at -0.6 V bias voltage.

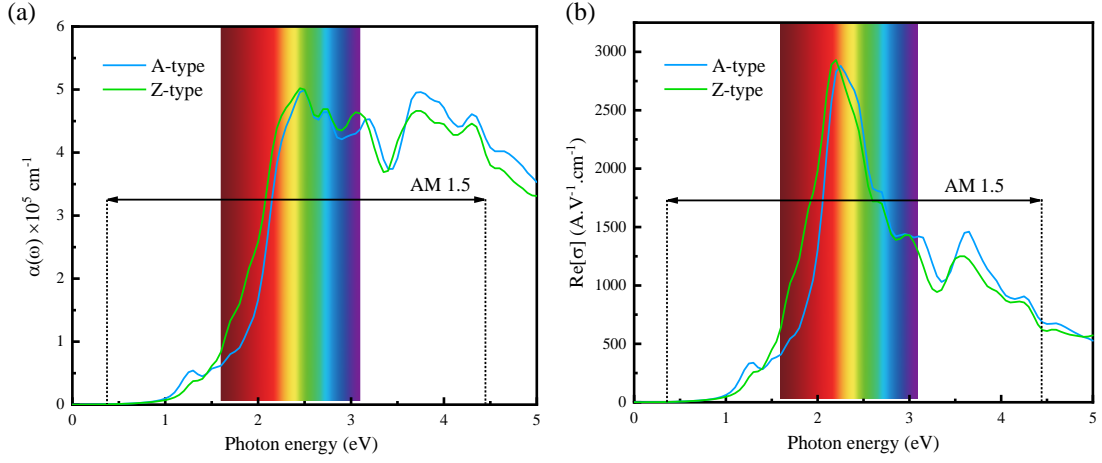

**FIG. S4.** (a) Optical absorption coefficient  $\alpha(\omega)$  and (b) photoconductivity  $\sigma$  of ML GeSe along the in-plane Zigzag (Z-type) and Armchair (A-type) directions.

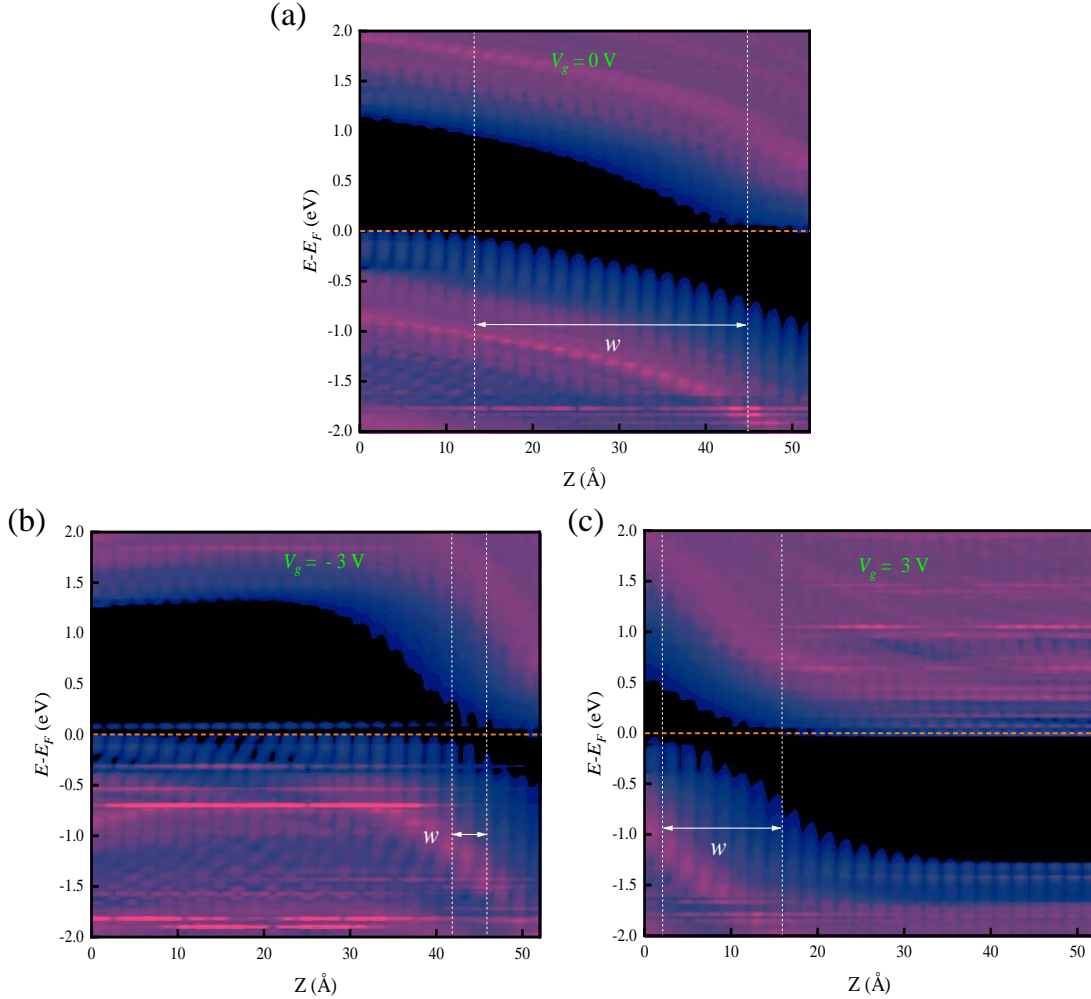

**FIG. S5.** Projected local density of states (PLDOS) for the Z-type GeSe *p-i-n* homojunction phototransistor at zero bias under 0 V (a), -3 V (b), and 3 V (c) gate voltages, where  $w$  denotes the width of the depletion region.

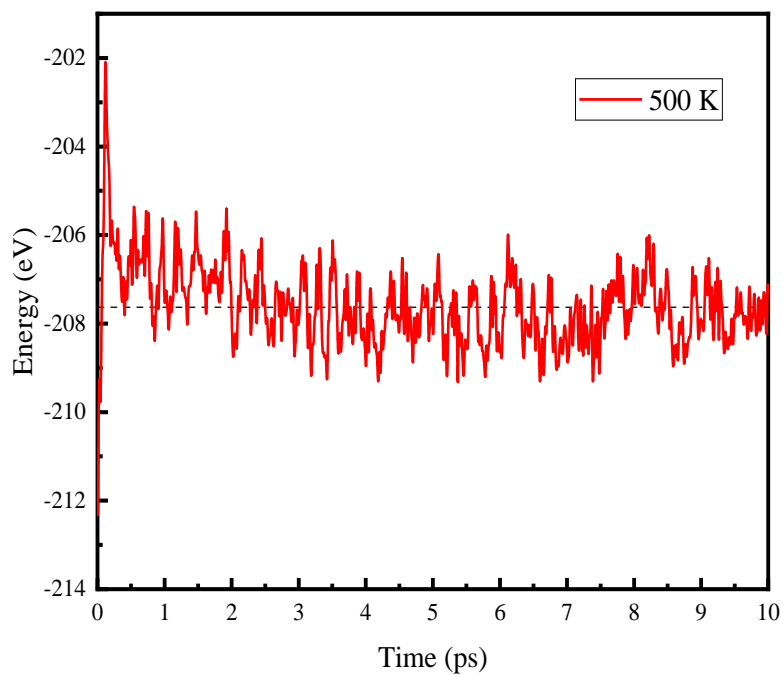

**FIG. S6.** AIMD simulation of the variation of the total energy of a  $4 \times 3 \times 1$  GeSe supercell at 500 K with a time step.

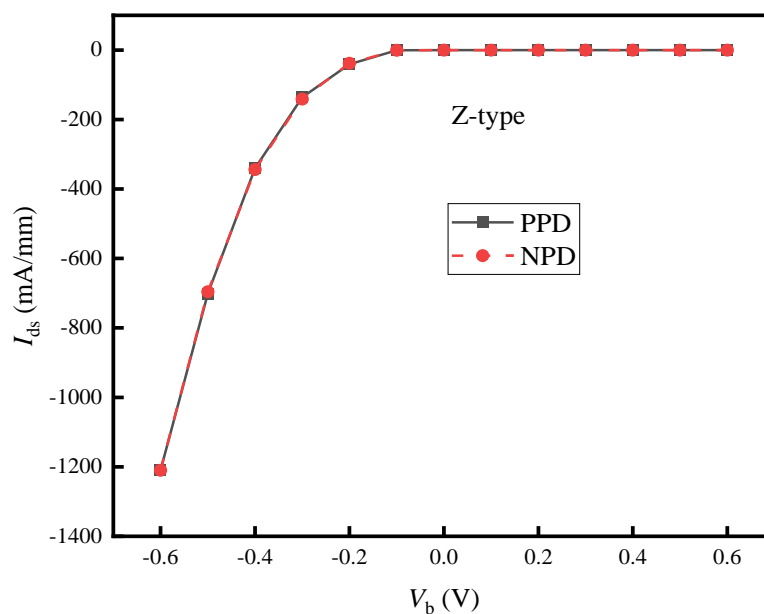

**FIG. S7.** Current-voltage characteristics of Z-type GeSe  $p-n$  junctions under Periodic, Periodic, and Dirichlet (PPD) and Neumann, Periodic, and Dirichlet (NPD) boundary conditions.

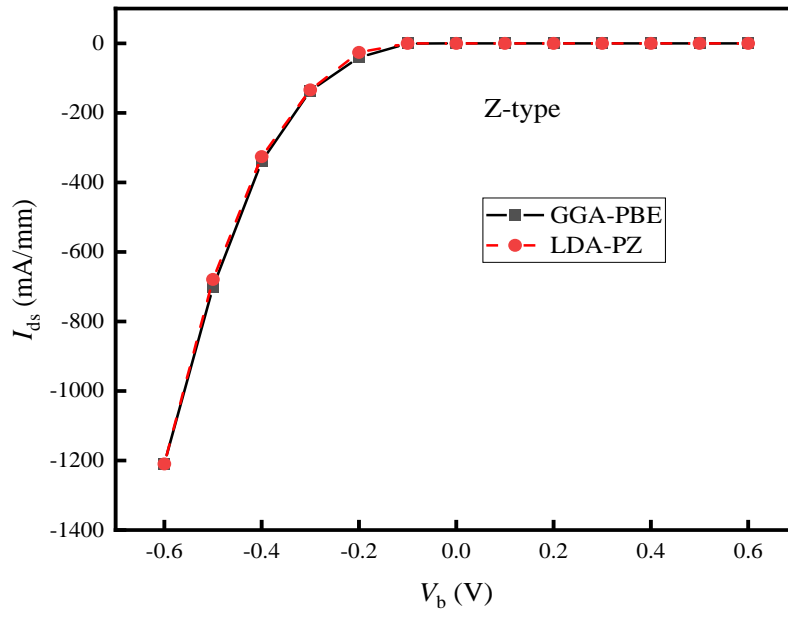

**FIG. S8.** Current-voltage characteristics of Z-type GeSe  $p$ - $n$  junctions under GGA-PBE and LDA-PZ exchange-correlation functions.
